# Supplementary material for: A new approach for trace analysis of guanidine compounds in surface water with resorcinarene-based ion chromatography columns
Source: Royal Society of Chemistry journal article supplement (doi:10.1039/c5an01076d), 2015-12-09
Supplement: c5an01076d1.pdf [file c5an01076d1.pdf]

Electronic Supplementary Information

## A new approach for trace analysis of guanidine compounds in surface water with resorcinarene-based ion chromatography columns

Tayyabeh Panahi, Douglas J. Weaver, John D. Lamb, Roger G. Harrison\*

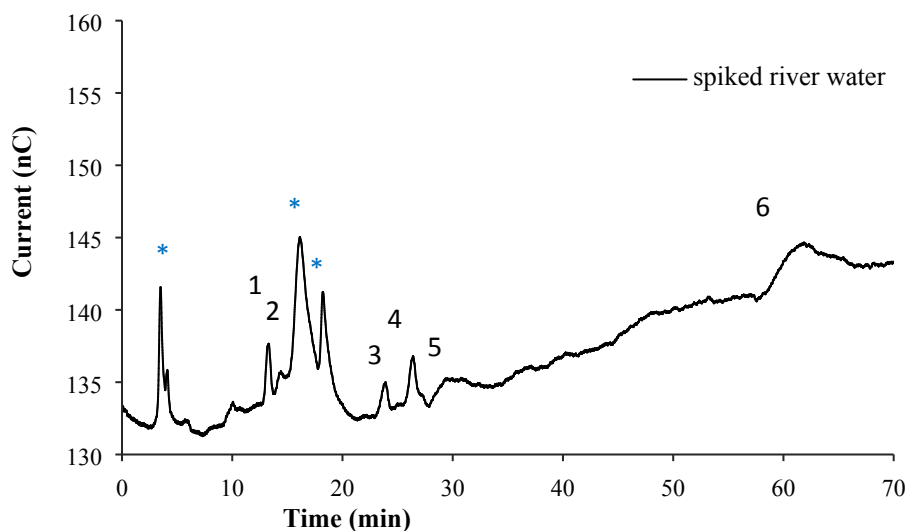

Figure ES1. Separation of guanidine derivatives in river water. Peak assignments: 1-G, 2-MG, 3-DMG, 4-Agm, 5-GBA and 6- CIM (\* matrix peaks). Dionex IonPac CS17 analytical column (4 x 250 mm) and IPAD were used. Conditions: flow rate 0.6 ml/min, column equilibrated 10 min with 3 mM MSA before injection. 0-3 min 3mM MSA, 3-5 min 5 mM, 5-7min 7 mM, 7-9 min 9 mM, 9-11 min 10 mM, 11-13 min 11 mM, 13-15 min 13 mM, 15-17 min 14 mM, 17-19 min 15 mM, 19-21 min 17 mM, 21-23 min 19 mM, 23-30 min 20 mM, 30-40 min 22 mM, 40-70 min 25 mM. Analyte concentrations equal to 75  $\mu\text{g/L}$ .

**Table 1** Calibration curves data obtained with ED detection at room temperature with MSA.

| Analyte | Concentration range 1-20 mg/L |                | Concentration range 0.05-0.85 mg/L  |                |            |            |
|---------|-------------------------------|----------------|-------------------------------------|----------------|------------|------------|
|         | Linear equation               | R <sup>2</sup> | Linear equation                     | R <sup>2</sup> | LOD (µg/L) | LOQ (µg/L) |
| G       | $y = 1.75x + 4.31$            | 0.99           | $y = 47.0 \times 10^{-4}x - 0.0828$ | 0.98           | 6          | 20         |
| MG      | $y = 1.36x + 4.03$            | 0.98           | $y = 62.0 \times 10^{-4}x + 1.06$   | 0.99           | 5.0        | 17         |
| DMG     | $y = 1.26x + 3.65$            | 0.98           | $y = 41.0 \times 10^{-4}x + 2.29$   | 0.99           | 32         | 110        |
| AGM     | $y = 1.69x + 2.44$            | 0.98           | $y = 42.0 \times 10^{-4}x - 0.375$  | 0.98           | 8.6        | 29         |
| GBA     | $y = 1.32x + 1.64$            | 0.97           | $y = 89.0 \times 10^{-4}x + 1.780$  | 0.99           | 76         | 250        |
| CIM     | $y = 4.29x + 2.37$            | 0.99           | $y = 53.0 \times 10^{-4}x + 1.88$   | 0.98           | 8.3        | 28         |

a: relative standard deviation was obtain for 3 replications of each experiment

**Table 2** Calibration curves data obtained with CD detection at room temperature with MSA.

| Analyte | Concentration range 1-20 mg/L |                | Concentration range 0.05-0.85 mg/L    |                |            |            |
|---------|-------------------------------|----------------|---------------------------------------|----------------|------------|------------|
|         | Linear equation               | R <sup>2</sup> | Linear equation                       | R <sup>2</sup> | LOD (µg/L) | LOQ (µg/L) |
| G       | $y = 0.248x - 0.132$          | 0.99           | $y = 2.00 \times 10^{-4}x + 0.00340$  | 0.99           | 1.7        | 5.7        |
| MG      | $y = 0.196x - 0.0697$         | 0.99           | $y = 2.00 \times 10^{-4}x - 0.00170$  | 0.99           | 8.2        | 27         |
| DMG     | $y = 0.125x + 0.0005$         | 0.99           | $y = 8.00 \times 10^{-5}x + 0.0299$   | 0.99           | 15         | 52         |
| AGM     | $y = 0.212x - 0.0419$         | 0.99           | $y = 1.00 \times 10^{-4}x + 0.00360$  | 0.99           | 1.7        | 5.7        |
| GBA     | $y = 0.0931x - 0.00740$       | 0.99           | $y = 8.00 \times 10^{-5}x + 0.000300$ | 0.98           | 5.7        | 19         |

a: relative standard deviation was obtain for 3 replications of each experiment

**Table 3** Calibration curves data obtained with UV-Vis detection at room temperature with MSA.

| Analyte | Concentration range 1-20 mg/L |                | Concentration range 0.05-0.85 mg/L   |                | LOD<br>( $\mu\text{g/L}$ ) | LOQ<br>( $\mu\text{g/L}$ ) |
|---------|-------------------------------|----------------|--------------------------------------|----------------|----------------------------|----------------------------|
|         | Linear equation               | R <sup>2</sup> | Linear equation                      | R <sup>2</sup> |                            |                            |
| G       | $y = 0.233x - 0.00260$        | 0.99           | $y = 2.00 \times 10^{-4}x + 0.0122$  | 0.99           | 66                         | 220                        |
| MG      | $y = 1.03x - 0.949$           | 0.99           | $y = 2 \times 10^{-4}x + 0.00930$    | 0.99           | 24                         | 82                         |
| DMG     | $y = 0.122x + 0.0366$         | 0.99           | $y = 9.00 \times 10^{-5}x + 0.0358$  | 0.99           | 11                         | 34                         |
| GBA     | $y = 0.0912x - 0.0341$        | 0.99           | $y = 9.00 \times 10^{-5}x - 0.00460$ | 0.98           | 34                         | 110                        |
| CIM     | $y = 2.29x + 3.15$            | 0.99           | $y = 758 \times 10^{-4}x + 4.69$     | 0.98           | 5.1                        | 17                         |

a: relative standard deviation was obtain for 3 replications of each experiment
